# Supplementary material
Source: MDPI journal article supplement (https://www.mdpi.com/2072-4292/8/8/684)
Supplement: s1 [file s1]

| combination of input scenes            | band chosen in step 1 | band chosen in step 2 | band chosen in step 3 | band chosen in step 4 | band chosen in step 5 | band chosen in step 6 |
|----------------------------------------|-----------------------|-----------------------|-----------------------|-----------------------|-----------------------|-----------------------|
| RS_June_25 TSX_5_dates                 | TSX_July_7            | RS_June_25_C22        | TSX_July_29           | RS_June_25_entropy    | RS_June_25_degofpol   | RS_June_25_alpha      |
| RS_July_29 TSX_5_dates                 | RS_July_29_degofpol   | TSX_July_7            | RS_July_29_C22        | RS_July_29_alpha      | TSX_July_29           | RS_July_29_entropy    |
| Envisat_June_26                        | Envisat_June26_VH     | Envisat_June26_VV     |                       |                       |                       |                       |
| Envisat_June_26 RS_June_25             | RS_June_25_alpha      | RS_June_25_C11        | Envisat_June26_VV     | RS_June_25_degofpol   |                       |                       |
| Envisat_June_26 RS_June_25 TSX_5_dates | TSX_July_7            | RS_June_25_C22        | Envisat_June26_VV     | TSX_July_29           | RS_June_25_entropy    | TSX_June_26           |
| Envisat_June_26 RS_July_29             | RS_July_29_degofpol   | RS_July_29_C22        | RS_July_29_alpha      | Envisat_June26_VH     | Envisat_June26_VV     |                       |
| Envisat_June_26 RS_July_29 TSX_5_dates | RS_July_29_degofpol   | TSX_July_7            | Envisat_June26_VV     | Envisat_June26_VH     | TSX_July_29           | RS_July_29_alpha      |
| Envisat_June_26 RS_June_25 RS_July_29  | RS_July_29_degofpol   | RS_June_25_C22        | RS_July_29_C22        | Envisat_June26_VV     | RS_June_25_entropy    | RS_June_25_degofpol   |
| Envisat_June_26 TSX_5_dates            | TSX_July_7            | Envisat_June26_VH     | TSX_July_29           | Envisat_June26_VV     |                       |                       |
| RS_June_25                             | RS_June_25_alpha      | RS_June_25_C11        | RS_June_25_degofpol   |                       |                       |                       |
| RS_June_25 RS_July_29                  | RS_July_29_degofpol   | RS_June_25_C22        | RS_July_29_C22        | RS_June_25_entropy    | RS_June_25_degofpol   | RS_July_29_entropy    |
| RS_July_29                             | RS_July_29_degofpol   | RS_July_29_C22        | RS_July_29_alpha      | RS_July_29_entropy    |                       |                       |
| RS_June_25 RS_July_29 TSX_5_dates      | RS_July_29_degofpol   | TSX_July_7            | RS_June_25_C11        | RS_June_25_C22        | RS_July_29_C22        | RS_July_29_alpha      |
| TSX_5_dates                            | TSX_July_7            | TSX_July_29           | TSX_Aug_9             | TSX_June_26           |                       |                       |
| All_dates                              | RS_July_29_degofpol   | TSX_July_7            | RS_June_25_C11        | Envisat_June26_VH     | Envisat_June26_VV     | TSX_July_29           |

| band chosen in step 7 | band chosen in step 8 | band chosen in step 9 | band chosen in step 10 | band chosen in step 11 | band chosen in step 12 | band chosen in step 13 |
|-----------------------|-----------------------|-----------------------|------------------------|------------------------|------------------------|------------------------|
| TSX_June_26           | TSX_Aug_9             | RS_June_25_C11        | TSX_July_18            |                        |                        |                        |
| RS_July_29_C11        |                       |                       |                        |                        |                        |                        |
|                       |                       |                       |                        |                        |                        |                        |
|                       |                       |                       |                        |                        |                        |                        |
| TSX_Aug_9             | Envisat_June26_VH     | RS_June_25_alpha      | TSX_July_18            |                        |                        |                        |
|                       |                       |                       |                        |                        |                        |                        |
| RS_July_29_C22        | RS_July_29_entropy    | TSX_June_26           | TSX_Aug_9              | TSX_July_18            |                        |                        |
| RS_July_29_alpha      | RS_July_29_entropy    |                       |                        |                        |                        |                        |
|                       |                       |                       |                        |                        |                        |                        |
|                       |                       |                       |                        |                        |                        |                        |
| RS_July_29_alpha      |                       |                       |                        |                        |                        |                        |
|                       |                       |                       |                        |                        |                        |                        |
| TSX_Aug_9             | TSX_June_26           | RS_July_29_entropy    | RS_June_25_entropy     | RS_June_25_alpha       | TSX_July_18            | TSX_July_29            |
|                       |                       |                       |                        |                        |                        |                        |
| RS_July_29_alpha      | RS_July_29_C22        | RS_July_29_entropy    | TSX_June_26            | TSX_Aug_9              | RS_June_25_C22         | TSX_July_18            |
