# Supplementary material
Source: MDPI journal article supplement (https://www.mdpi.com/2072-4292/8/8/684)
Supplement: s1 [file s1]

| combination of input scenes                       | band chosen in step 1 | band chosen in step 2 | band chosen in step 3 | band chosen in step 4 |
|---------------------------------------------------|-----------------------|-----------------------|-----------------------|-----------------------|
| TSX_July_5                                        | TSX_July_5_c12r       | TSX_July_5_entropy    | TSX_July_5_alpha      | TSX_July_5_c12i       |
| TSX_July_5 TSX_July_16                            | TSX_July_16_c12r      | TSX_July_5_c11        | TSX_July_16_degofpol  | TSX_July_5_degofpol   |
| TSX_July_5 TSX_July_16 TSX_July_27                | TSX_July_27_alpha     | TSX_July_16_degofpol  | TSX_July_5_degofpol   | TSX_July_27_c22       |
| TSX_July_5 TSX_July_16 TSX_July_27 Formosat_Aug_9 | TSX_July_27_alpha     | TSX_July_16_degofpol  | FORMOSAT2_Aug_9-Band1 | TSX_July_5_degofpol   |
| TSX_July_5 TSX_July_16 TSX_Aug_7                  | TSX_July_16_c12r      | TSX_July_5_c11        | TSX_July_16_degofpol  | TSX_July_5_degofpol   |
| TSX_July_5 TSX_July_16 TSX_Aug_7 Formosat_Aug_9   | TSX_July_16_c12r      | FORMOSAT2_Aug_9-Band2 | FORMOSAT2_Aug_9-Band4 | TSX_July_5_entropy    |
| TSX_July_5 TSX_July_16 Formosat_Aug_9             | TSX_July_16_c12r      | FORMOSAT2_Aug_9-Band2 | FORMOSAT2_Aug_9-Band4 | TSX_July_5_entropy    |
| TSX_July_5 TSX_July_27                            | TSX_July_27_alpha     | TSX_July_5_degofpol   | TSX_July_27_c11       | TSX_July_27_entropy   |
| TSX_July_5 TSX_July_27 TSX_Aug_7                  | TSX_July_27_alpha     | TSX_July_5_degofpol   | TSX_July_27_c11       | TSX_July_27_entropy   |
| TSX_July_5 TSX_July_27 TSX_Aug_7 Formosat_Aug_9   | TSX_July_27_alpha     | TSX_July_5_degofpol   | FORMOSAT2_Aug_9-Band3 | FORMOSAT2_Aug_9-Band4 |
| TSX_July_5 TSX_July_27 Formosat_Aug_9             | TSX_July_27_alpha     | TSX_July_5_degofpol   | FORMOSAT2_Aug_9-Band3 | FORMOSAT2_Aug_9-Band4 |
| TSX_July_5 TSX_Aug_7                              | TSX_July_5_c12r       | TSX_July_5_entropy    | TSX_Aug_7_alpha       | TSX_Aug_7_degofpol    |
| TSX_July_5 TSX_Aug_7 Formosat_Aug_9               | TSX_July_5_c12r       | FORMOSAT2_Aug_9-Band3 | FORMOSAT2_Aug_9-Band4 | TSX_July_5_degofpol   |
| TSX_July_5 Formosat_Aug_9                         | TSX_July_5_c12r       | FORMOSAT2_Aug_9-Band3 | FORMOSAT2_Aug_9-Band4 | TSX_July_5_degofpol   |
| TSX_July_16                                       | TSX_July_16_c12r      | TSX_July_16_alpha     | TSX_July_16_entropy   | TSX_July_16_c22       |
| TSX_July_16 TSX_July_27                           | TSX_July_27_alpha     | TSX_July_16_degofpol  | TSX_July_16_c12r      | TSX_July_27_c12r      |
| TSX_July_16 TSX_July_27 TSX_Aug_7                 | TSX_July_27_alpha     | TSX_July_16_degofpol  | TSX_July_16_c12r      | TSX_July_27_c12r      |
| TSX_July_16 TSX_July_27 TSX_Aug_7 Formosat_Aug_9  | TSX_July_27_alpha     | TSX_July_16_degofpol  | FORMOSAT2_Aug_9-Band1 | TSX_July_27_c12r      |
| TSX_July_16 TSX_July_27 Formosat_Aug_9            | TSX_July_27_alpha     | TSX_July_16_degofpol  | FORMOSAT2_Aug_9-Band1 | TSX_July_27_c12r      |
| TSX_July_16 TSX_Aug_7                             | TSX_July_16_c12r      | TSX_July_16_c11       | TSX_July_16_entropy   | TSX_Aug_7_c22         |
| TSX_July_16 TSX_Aug_7 Formosat_Aug_9              | TSX_July_16_c12r      | FORMOSAT2_Aug_9-Band2 | FORMOSAT2_Aug_9-Band4 | FORMOSAT2_Aug_9-Band1 |
| TSX_July_16 Formosat_Aug_9                        | TSX_July_16_c12r      | FORMOSAT2_Aug_9-Band2 | FORMOSAT2_Aug_9-Band4 | FORMOSAT2_Aug_9-Band1 |
| TSX_July_27                                       | TSX_July_27_alpha     | TSX_July_27_c22       | TSX_July_27_entropy   | TSX_July_27_c12i      |
| TSX_July_27 TSX_Aug_7                             | TSX_July_27_alpha     | TSX_July_27_c22       | TSX_July_27_entropy   | TSX_Aug_7_c12r        |
| TSX_July_27 TSX_Aug_7 Formosat_Aug_9              | TSX_July_27_alpha     | FORMOSAT2_Aug_9-Band3 | TSX_July_27_c22       | FORMOSAT2_Aug_9-Band4 |
| TSX_July_27 Formosat_Aug_9                        | TSX_July_27_alpha     | FORMOSAT2_Aug_9-Band3 | TSX_July_27_c22       | FORMOSAT2_Aug_9-Band4 |
| TSX_Aug_7                                         | TSX_Aug_7_alpha       | TSX_Aug_7_c11         | TSX_Aug_7_degofpol    | TSX_Aug_7_c12r        |
| TSX_Aug_7 Formosat_Aug_9                          | FORMOSAT2_Aug_9-Band2 | TSX_Aug_7_c12r        | FORMOSAT2_Aug_9-Band4 | TSX_Aug_7_degofpol    |
| allscenes                                         | TSX_July_27_alpha     | TSX_July_16_degofpol  | FORMOSAT2_Aug_9-Band1 | TSX_July_5_degofpol   |
| Formosat_Aug_9                                    | FORMOSAT2_Aug_9-Band2 | FORMOSAT2_Aug_9-Band4 | FORMOSAT2_Aug_9-Band3 | FORMOSAT2_Aug_9-Band1 |
| all4TSXscenes                                     | TSX_July_27_alpha     | TSX_July_16_degofpol  | TSX_July_5_degofpol   | TSX_July_27_c22       |

| band chosen in step 5 | band chosen in step 6 | band chosen in step 7 | band chosen in step 8 | band chosen in step 9 | band chosen in step 10 |
|-----------------------|-----------------------|-----------------------|-----------------------|-----------------------|------------------------|
| TSX_July_5_degofpol   |                       |                       |                       |                       |                        |
| TSX_July_5_alpha      | TSX_July_16_c11       | TSX_July_16_alpha     | TSX_July_16_c12i      | TSX_July_5_entropy    | TSX_July_16_c22        |
| TSX_July_5_alpha      | TSX_July_27_degofpol  | TSX_July_16_c11       | TSX_July_16_c12i      | TSX_July_16_alpha     | TSX_July_27_c11        |
| FORMOSAT2_Aug_9-Band4 | TSX_July_27_c12r      | TSX_July_16_c11       | TSX_July_27_degofpol  | TSX_July_5_alpha      | TSX_July_16_alpha      |
| TSX_Aug_7_alpha       | TSX_Aug_7_c12r        | TSX_July_5_alpha      | TSX_July_16_alpha     | TSX_July_16_c12i      | TSX_July_5_entropy     |
| TSX_July_16_entropy   | FORMOSAT2_Aug_9-Band1 | TSX_July_16_alpha     | TSX_Aug_7_degofpol    | TSX_July_16_c12i      | TSX_July_5_alpha       |
| TSX_July_16_entropy   | FORMOSAT2_Aug_9-Band1 | TSX_July_16_alpha     | TSX_July_16_c12i      | TSX_July_5_alpha      | TSX_July_5_degofpol    |
| TSX_July_5_c12r       | TSX_July_5_alpha      | TSX_July_27_c22       | TSX_July_5_entropy    | TSX_July_27_c12i      |                        |
| TSX_July_5_c12r       | TSX_Aug_7_degofpol    | TSX_Aug_7_alpha       | TSX_July_5_alpha      | TSX_July_27_c22       | TSX_Aug_7_c22          |
| TSX_Aug_7_degofpol    | FORMOSAT2_Aug_9-Band1 | TSX_July_27_c12r      | TSX_July_27_entropy   | TSX_July_5_alpha      |                        |
| FORMOSAT2_Aug_9-Band1 | TSX_July_27_c12r      | TSX_July_27_degofpol  | TSX_July_5_alpha      |                       |                        |
| TSX_Aug_7_c11         | TSX_July_5_alpha      | TSX_July_5_c12i       | TSX_Aug_7_c12i        | TSX_July_5_degofpol   | TSX_Aug_7_c22          |
| TSX_Aug_7_degofpol    | FORMOSAT2_Aug_9-Band1 | TSX_Aug_7_alpha       | TSX_July_5_entropy    | TSX_July_5_alpha      | TSX_Aug_7_c12r         |
| FORMOSAT2_Aug_9-Band1 | TSX_July_5_alpha      | TSX_July_5_entropy    |                       |                       |                        |
|                       |                       |                       |                       |                       |                        |
| TSX_July_27_degofpol  | TSX_July_16_c11       | TSX_July_27_c11       | TSX_July_27_c12i      | TSX_July_16_alpha     | TSX_July_27_entropy    |
| TSX_July_27_degofpol  | TSX_Aug_7_c12r        | TSX_Aug_7_alpha       | TSX_July_27_c12i      | TSX_Aug_7_degofpol    | TSX_July_16_c11        |
| FORMOSAT2_Aug_9-Band4 | TSX_Aug_7_c12r        | TSX_Aug_7_degofpol    | TSX_July_27_entropy   | FORMOSAT2_Aug_9-Band2 | TSX_July_27_c12i       |
| FORMOSAT2_Aug_9-Band4 | TSX_July_16_c12r      | TSX_July_27_c22       | FORMOSAT2_Aug_9-Band2 | TSX_July_27_degofpol  | TSX_July_27_c12i       |
| TSX_July_16_alpha     | TSX_Aug_7_alpha       | TSX_July_16_c12i      | TSX_Aug_7_c11         |                       |                        |
| TSX_Aug_7_degofpol    | TSX_July_16_entropy   | TSX_Aug_7_alpha       | TSX_July_16_c11       | TSX_Aug_7_entropy     | FORMOSAT2_Aug_9-Band3  |
| TSX_July_16_entropy   | TSX_July_16_alpha     | TSX_July_16_c12i      |                       |                       |                        |
| TSX_July_27_c11       |                       |                       |                       |                       |                        |
| TSX_Aug_7_entropy     | TSX_Aug_7_alpha       | TSX_July_27_c12i      |                       |                       |                        |
| FORMOSAT2_Aug_9-Band1 | TSX_Aug_7_entropy     | TSX_July_27_entropy   | FORMOSAT2_Aug_9-Band2 | TSX_July_27_c12r      | TSX_Aug_7_alpha        |
| FORMOSAT2_Aug_9-Band1 | TSX_July_27_entropy   | FORMOSAT2_Aug_9-Band2 |                       |                       |                        |
| TSX_Aug_7_c12i        | TSX_Aug_7_c22         |                       |                       |                       |                        |
| FORMOSAT2_Aug_9-Band1 | TSX_Aug_7_alpha       |                       |                       |                       |                        |
| FORMOSAT2_Aug_9-Band4 | TSX_July_27_c12r      | TSX_Aug_7_degofpol    | TSX_July_16_c11       | TSX_July_5_alpha      | TSX_July_27_entropy    |
|                       |                       |                       |                       |                       |                        |
| TSX_July_5_alpha      | TSX_July_27_degofpol  | TSX_July_16_c11       | TSX_Aug_7_alpha       | TSX_Aug_7_degofpol    | TSX_July_5_entropy     |

| band chosen in step 11 | band chosen in step 12 | band chosen in step 13 | band chosen in step 14 | band chosen in step 15 |
|------------------------|------------------------|------------------------|------------------------|------------------------|
|                        |                        |                        |                        |                        |
|                        |                        |                        |                        |                        |
| TSX_July_5_entropy     | TSX_July_27_entropy    |                        |                        |                        |
|                        |                        |                        |                        |                        |
| TSX_July_16_c11        |                        |                        |                        |                        |
| TSX_July_5_degofpol    | TSX_Aug_7_alpha        |                        |                        |                        |
|                        |                        |                        |                        |                        |
|                        |                        |                        |                        |                        |
| TSX_July_5_entropy     | TSX_July_27_c12i       | TSX_July_27_c12r       | TSX_July_5_c11         | TSX_Aug_7_c11          |
|                        |                        |                        |                        |                        |
|                        |                        |                        |                        |                        |
|                        |                        |                        |                        |                        |
| TSX_Aug_7_entropy      |                        |                        |                        |                        |
|                        |                        |                        |                        |                        |
|                        |                        |                        |                        |                        |
| TSX_July_27_c22        |                        |                        |                        |                        |
| TSX_July_27_c11        |                        |                        |                        |                        |
| TSX_July_27_c22        |                        |                        |                        |                        |
|                        |                        |                        |                        |                        |
|                        |                        |                        |                        |                        |
|                        |                        |                        |                        |                        |
|                        |                        |                        |                        |                        |
|                        |                        |                        |                        |                        |
|                        |                        |                        |                        |                        |
|                        |                        |                        |                        |                        |
|                        |                        |                        |                        |                        |
|                        |                        |                        |                        |                        |
|                        |                        |                        |                        |                        |
|                        |                        |                        |                        |                        |
| FORMOSAT2_Aug_9-Band3  |                        |                        |                        |                        |
|                        |                        |                        |                        |                        |
|                        |                        |                        |                        |                        |
| TSX_July_16_c12i       | TSX_July_27_entropy    | TSX_July_16_alpha      | TSX_July_27_c11        |                        |
