# Supplementary material
Source: MDPI journal article supplement (https://www.mdpi.com/2072-4292/8/8/684)
Supplement: s1 [file s1]

Archive with 3 entries (3 files):
- landuseskript_attachement.py
- usedbands_bigextend.pdf
- usedbands_smallextend.pdf
